# Supplementary material for: Pasture Names with Romance and Slavic Roots Facilitate Dissection of Y Chromosome Variation in an Exclusively German-Speaking Alpine Region
Source: PLoS One. 2012 Jul 27;7(7):e41885. doi: 10.1371/journal.pone.0041885 (PMC3407130; doi:10.1371/journal.pone.0041885)
Supplement: Table S3 — Oligonucleotides used for 19-plex single nucleotide primer extension. The primer sequences were either taken from the literature [65]–[68], [70] or designed in-house. (DOC) [file pone.0041885.s009.doc]

**Table S3. Oligonucleotides used for 19-plex single nucleotide primer extension.**

| **Oligonucleotide** | **Sequence (5'→3')** | **nt** |
| --- | --- | --- |
| P37SNPE F | CT**TAGGGTGGGATTGGTTCA** | 20 |
| M89SNPE R | T**CAACTCAGGCAAAGTGAGAGAT** | 23 |
| U106SNPE F | (GACT)2**GCAAATCCCAAAGCTCCA** | 26 |
| M45SNPE R[65,68] | (GACT)3T**CTCAGAAGGAGCTTTTTGC** | 32 |
| SRY10831SNPE R | (GACT)2**TCTTGTATCTGACTTTTTCACACAGT** | 34 |
| P15SNPE F | ACT(GACT)2GAC**ATGCTTGAGGTTCTGAATCTTA** | 36 |
| M269SNPE F[66] | ACT(GACT)3GA**GGAATGATCAGGGTTTGGTTAAT** | 40 |
| M17SNPE.R[65,67,68] | (GACT)5GA**CCAAAATTCACTTAAAAAAACCC** | 45 |
| M223SNPE R | (GACT)5GA**CTGCACATTGATAAATTTACTTACAGT** | 49 |
| M253SNPE F | (GACT)7**GTATTGTTGATAGATAGCAAGTTGA** | 53 |
| U152SNPE F | (GACT)7GAC**TCTATACATTACTTTGAGAAGTATGG** | 57 |
| M78SNPE R[66] | (GACT)9G**TTTTGAAATATTTGGAAGGGC** | 58 |
| M343SNPE R | (GACT)11T**CCACATATCTCCAGGTGT** | 63 |
| M304SNPE F[68] | (GACT)10**TGTTCAATTTGAAAGTAACTTGTGA** | 65 |
| M201SNPE F[68] | (GACT)10**GATCTAATAATCCAGTATCAACTGAGG** | 67 |
| M173SNPE F | (GACT)10GAC**TCTTACAATTCAAGGGCATTTAGAAC** | 69 |
| M170SNPE F[68] | (GACT)11**CTATTTTATTTACTTAAAAATCATTGTTC** | 73 |
| M9SNPE F[66,70] | (GACT)14G**ACGGCCTAAGATGGTTGAAT** | 77 |
| M96SNPE F | (GACT)14**CTTGGAAAACAGGTCTCTCATAATA** | 81 |

**F**(orward) and **R**(everse) primer designations relate to the Y-chromosome + strand orientation

Target-specific sequences are indicated by boldface letters, **nt**: nucleotides

The primer sequences were either taken from the literature or designed in-house.
