# Supplementary material for: Pasture Names with Romance and Slavic Roots Facilitate Dissection of Y Chromosome Variation in an Exclusively German-Speaking Alpine Region
Source: PLoS One. 2012 Jul 27;7(7):e41885. doi: 10.1371/journal.pone.0041885 (PMC3407130; doi:10.1371/journal.pone.0041885)
Supplement: Table S5 — Sampling statistics. Sampling coverage and geographic localizations of the East Tyrolean municipalities are shown. (XLS) [file pone.0041885.s011.xls]

## Sheet: Tabelle1
	Table S5. Sampling statistics and geographical localizations of the East Tyrolean municipalities covered in this study.
	Municipality	Coordinates (WGS84)	Elevation (m)	Region	Valley	Population*	% of ETY	PRO	% sampled	FA	GF
	Abfaltersbach	46.756028, 12.529000°	983	A	Puster valley	659	1.30441	2	0.30349	2	3
	Anras	46.772537, 12.556804°	1261	A	Puster valley	1293	2.55933	6	0.464037	5	1
	Assling	46.786389, 12.641111°	1128	A	Puster valley	1945	3.84988	10	0.514139	11	11
	Außervillgraten	46.786667, 12.428611°	1287	A	Villgraten valley	843	1.66861	2	0.237248	2	1
	Heinfels	46.761111, 12.439722°	1078	A	Puster valley	1039	2.05657	0	0	0	0
	Innervillgraten	46.806667, 12.373056°	1402	A	Villgraten valley	1011	2.00115	2	0.197824	4	5
	Kartitsch	46.725833, 12.499167°	1353	A	Gail valley	865	1.71216	2	0.231214	3	2
	Obertilliach	46.708611, 12.616111°	1450	A	Gail valley	750	1.48453	2	0.266667	5	6
	Sillian	46.747500, 12.417500°	1103	A	Puster valley	2106	4.16856	7	0.332384	8	2
	Strassen	46.749444, 12.488056°	1099	A	Puster valley	854	1.69039	0	0	2	2
	Untertilliach	46.703611, 12.677500°	1235	A	Gail valley	264	0.522555	2	0.757576	4	3
	Ainet	46.850000, 12.683333°	747	B	Isel valley	967	1.91406	6	0.620476	7	4
	Amlach	46.813333, 12.761111°	689	B	Puster valley	389	0.769977	3	0.771208	3	1
	Dölsach	46.827778, 12.840278°	731	B	lower Drau valley	2310	4.57236	7	0.30303	4	3
	Gaimberg	46.845278, 12.785556°	758	B	lower Drau valley	838	1.65872	10	1.19332	5	3
	Hopfgarten in Defereggen	46.921111, 12.519167°	1107	B	Defereggen valley	784	1.55183	3	0.382653	6	7
	Iselsberg-Stronach	46.833611, 12.847778°	1117	B	lower Drau valley	607	1.20148	0	0	0	1
	Kals am Großglockner	47.003611, 12.644722°	1324	B	Kals valley	1275	2.5237	9	0.705882	7	3
	Lavant	46.798889, 12.838056°	675	B	lower Drau valley	280	0.554225	3	1.07143	3	3
	Leisach	46.809444, 12.750000°	710	B	Puster valley	869	1.72008	11	1.26582	8	6
	Lienz	46.829722, 12.769722°	673	B	lower Drau, Puster, Isel valley	12103	23.9564	99	0.817979	45	15
	Matrei in Osttirol	47.000000, 12.540000°	975	B	Isel valley	4994	9.885	8	0.160192	7	12
	Nikolsdorf	46.785000, 12.905833°	888	B	lower Drau valley	874	1.72997	11	1.25858	10	11
	Nußdorf-Debant	46.831667, 12.814722°	674	B	lower Drau valley	3259	6.45078	5	0.153421	2	1
	Oberlienz	46.843889, 12.730000°	756	B	Isel valley	1448	2.86613	9	0.621547	7	4
	Prägraten am Großvenediger	47.016667, 12.366667°	1312	B	Virgen valley	1254	2.48214	4	0.318979	6	3
	Schlaiten	46.877222, 12.655833°	876	B	Isel valley	484	0.958017	8	1.65289	5	5
	St. Jakob in Defereggen	46.916667, 12.316667°	1389	B	Defereggen valley	953	1.88634	0	0	3	2
	St. Johann im Walde	46.904167, 12.629722°	748	B	Isel valley	308	0.609647	3	0.974026	2	1
	St. Veit in Defereggen	46.925556, 12.425833°	1495	B	Defereggen valley	768	1.52016	4	0.520833	5	5
	Thurn	46.849722, 12.760000°	855	B	Isel valley	618	1.22325	9	1.45631	10	6
	Tristach	46.817222, 12.787500°	672	B	lower Drau valley	1349	2.67018	19	1.40845	10	6
	Virgen	47.003472, 12.457917°	1194	B	Virgen valley	2161	4.27743	4	0.185099	4	3
	no information provided	n.a.	n.a.	n.a.		n.a.	n.a.	0	n.a.	14	85
	not from East Tyrol	n.a.	n.a.	n.a.		n.a.	n.a.	0	n.a.	51	44
	Sum	n.a.	n.a.	ETY		50521	n.a.	270	0.53	205	141
	number of municipalities (sampled)	n.a.	n.a.	ETY		33	n.a.	29	87.88	31	32
	Sum	n.a.	n.a.	A		11629	n.a.	35	0.3	46	36
	number of municipalities (sampled)	n.a.	n.a.	A		11	n.a.	9	81.81	10	10
	Sum	n.a.	n.a.	B		38892	n.a.	235	0.6	159	105
	number of municipalities (sampled)	n.a.	n.a.	B		22	n.a.	20	90.91	21	22
	*: Total population size as of 2008-01-01; data taken from: Gemeindeverzeichnis (ISBN 978-3-902587-48-0),
	published by 'Statistik Austria'
	ETY: East Tyrol
	PRO: Probands
	FA: Fathers
	GF: Paternal grandfathers
	n.a.: Not applicable
