# Supplementary material for: Pasture Names with Romance and Slavic Roots Facilitate Dissection of Y Chromosome Variation in an Exclusively German-Speaking Alpine Region
Source: PLoS One. 2012 Jul 27;7(7):e41885. doi: 10.1371/journal.pone.0041885 (PMC3407130; doi:10.1371/journal.pone.0041885)
Supplement: Table S6 — Average road distances. Average pairwise road-distances among all municipalities in the respective East Tyrolean regions and valleys are shown. (XLS) [file pone.0041885.s012.xls]

## Sheet: Tabelle1
Table S6. Average road distances.
		average		number of	Coefficient	median	minimum	maximum
Valley or	Valley or	road		pairwise	of Variation	road	road	road
region	region	distance (km)	sdev	distances	(%)	dist. (km)	dist. (km)	dist. (km)
within East Tyrol		36.3571	22.1863	406	61.0231	35	2	98
Region A	Region B	53.2111	18.7423	180	35.2225	52	12	98
within Region A		19.6111	9.19092	36	46.8659	19	4	39
Puster V.	Gail V.	22.1667	9.09379	12	41.0246	22.5	8	39
Puster V.	Villgraten V.	20.5	8.5021	8	41.4737	19	9	35
Villgraten V.	Gail V.	25.6667	7.94145	6	30.9407	27	14	36
within Region B		23.5632	14.7632	190	62.6536	21	2	60
Defereggen V.	Isel V.	26.3333	7.2153	12	27.3999	27	12	37
Defereggen V.	Kals V.	34.5	6.36396	2	18.4463	34.5	30	39
Defereggen V.	Drau V.	39.75	6.62125	12	16.6572	39.5	30	53
Defereggen V.	Lienz	32.5	6.36396	2	2	32.5	28	37
Defereggen V.	Puster V.	35.5	5.19615	4	14.637	35.5	31	40
Defereggen V.	Virgen V	37.5	6.36396	2	16.9706	37.5	33	42
Isel V.	Kals V.	27.8333	5.74166	6	20.6287	29	18	34
Isel V.	Drau V.	19.1667	10.454	36	54.5425	18	2	46
Isel V	Lienz	12.5	9.75192	6	78.0154	10.5	4	30
Isel V.	Puster V.	15.4167	9.38527	12	60.8774	13.5	6	33
Isel V.	Virgen V.	29.6667	10.9406	12	36.8785	32	7	44
Kals V.	Drau V.	40.8333	5.19294	6	12.7174	39.5	36	50
Kals V.	Lienz	34	N/A	1	N/A	N/A	N/A	N/A
Kals V.	Puster V.	37	0	2	0	37	37	37
Kals V.	Virgen V.	42.5	4.94975	2	11.6465	42.5	39	46
Drau V.	Lienz	7	5.01996	6	71.7137	5.5	3	16
Drau V.	Puster V.	9.25	4.55522	12	49.2456	8	3	18
Drau V.	Virgen V.	44.2308	12.6435	13	28.5854	46	7	60
Lienz	Puster V.	3	0	2	0	3	3	3
Lienz	Virgen V.	40.5	4.94975	2	12.2216	40.5	37	44
Puster V.	Virgen V.	43.5	4.04145	4	9.29069	43.5	40	47
